# Supplementary material for: Primary particle emissions and atmospheric secondary aerosol formation potential from a large-scale wood-pellet-fired heating plant
Source: Copernicus journal article supplement (doi:10.5194/ar-4-23-2026), 2026-02-02
Supplement: Supplementary file 1 [file ar-4-23-2026-supplement.pdf]

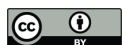

*Supplement of*

## **Primary particle emissions and atmospheric secondary aerosol formation potential from a large-scale wood-pellet-fired heating plant**

**Fanni Mylläri et al.**

*Correspondence to:* Topi Rönkkö ([topi.ronkko@tuni.fi](mailto:topi.ronkko@tuni.fi))

The copyright of individual parts of the supplement might differ from the article licence.



**Table S1.** The characteristics of the pellets used during the experiment. Analysis of the pellets were made in the Eurofins laboratory. Further details can be found in Niemelä et al. 2022.

|                                          | <i>Pellet 1</i> | <i>Pellet 2</i> |
|------------------------------------------|-----------------|-----------------|
| <i>Moisture (%)</i>                      | 6.6             | 6.9             |
| <i>Ash (550 °C) (%)</i>                  | 0.9             | 0.4             |
| <i>Volatiles (%)</i>                     | 84.1            | 85.1            |
| <i>Effective calorific value (MJ/kg)</i> | 18.58           | 19.08           |
| <i>Carbon (%)</i>                        | 50.1            | 50.9            |
| <i>Hydrogen (%)</i>                      | 5.9             | 6.0             |
| <i>Nitrogen (%)</i>                      | 0.24            | 0.17            |
| <i>Oxygen (% , calculated)</i>           | 42.8            | 42.6            |
| <i>Ca (mg/kg)</i>                        | 2500            | 790             |
| <i>Mg (mg/kg)</i>                        | 250             | 140             |
| <i>Na (mg/kg)</i>                        | 57              | 53              |
| <i>K (mg/kg)</i>                         | 1000            | 410             |
| <i>P (mg/kg)</i>                         | 150             | 34              |
| <i>S (mg/kg)</i>                         | 150             | 48              |
| <i>Fe (mg/kg)</i>                        | 47              | 11              |
| <i>Al (mg/kg)</i>                        | 63              | 12              |
| <i>Si (mg/kg)</i>                        | 350             | 31              |
| <i>Ti (mg/kg)</i>                        | 3.5             | <1              |
| <i>Mn (mg/kg)</i>                        | 27              | 76              |
| <i>Ba (mg/kg)</i>                        | 11              | 12              |
| <i>Cr (mg/kg)</i>                        | <1              | <1              |
| <i>Cu (mg/kg)</i>                        | 1.4             | 1.5             |
| <i>Ni (mg/kg)</i>                        | <1              | <1              |
| <i>Zn (mg/kg)</i>                        | 17              | 8.9             |
| <i>Pb (mg/kg)</i>                        | <10             | <10             |
| <i>V (mg/kg)</i>                         | <1              | <1              |
| <i>F (%)</i>                             | <0.001          | <0.001          |
| <i>Cl (%)</i>                            | 0.005           | 0.002           |

**Table S2.** The median diameters of the particle number size distributions measured by ELPI ( $D_a$ ) and SMPS ( $D_p$ ) and the effective density of the particles at three different load conditions.

|       | $D_a$ (nm) | $D_p$ (nm) | $\rho_{\text{eff}}$ (g/cm <sup>3</sup> ) |
|-------|------------|------------|------------------------------------------|
| 100MW | 136        | 75         | 2.13                                     |
| 60MW  | 159        | 79         | 2.48                                     |
| 30MW  | 193        | 96         | 2.55                                     |

## References

Niemelä, N. P., Mylläri, F., Kuittinen, N., Aurela, M., Helin, A., Kuula, J., Teinilä, K., Nikka, M., Vainio, O., Arffman, A., Lintusaari, H., Timonen, H., Rönkkö, T., Joronen, T. Experimental and numerical analysis of fine particle and soot formation in a modern 100 MW pulverized biomass heating plant, *Combustion and Flame*, 240, 2022, 111960, <https://doi.org/10.1016/j.combustflame.2021.111960>.
